# Supplementary material for: The Prognostic Significance of PD1 and PDL1 Gene Expression in Lung Cancer: A Meta-Analysis
Source: PubMed Central journal article supplement (PMC8639141; doi:10.3389/fonc.2021.759497), 2021-11-18
Supplement: DataSheet_1.pdf [file DataSheet_1.pdf]

**Supplement Table 1 Clinical characteristics of lung cancer patients**

|               |                         | Research                 |                         |                         |                          |                         |                        |               |              | Validate                |                          |
|---------------|-------------------------|--------------------------|-------------------------|-------------------------|--------------------------|-------------------------|------------------------|---------------|--------------|-------------------------|--------------------------|
|               |                         | Total                    | GSE31210                | GSE8894                 | GSE30219                 | GSE37745                | GSE50081               | GSE3141       | GSE31908     | GSE29013                | GSE157011                |
| Study         |                         | Number (%)               | Number (%)              | Number (%)              | Number (%)               | Number (%)              | Number (%)             | Number (%)    | Number (%)   | Number (%)              | Number (%)               |
| Country       |                         |                          | Japan                   | South Korea             | France                   | Sweden                  | Canada                 | USA           | USA          | USA                     | USA                      |
| Sample Size   |                         | 1251 ( 100.00)           | 246 ( 19.66)            | 138 ( 11.03)            | 307 ( 24.54)             | 196 ( 15.67)            | 181 ( 14.16)           | 111 ( 8.87)   | 17 ( 1.36)   | 55 ( 4.40)              | 482 (100.00)             |
| Age           | Mean ± SD ( range )     | 62.68 ± 10.17 ( 13 ~ 89) | 59.54 ± 8.08 ( 30 ~ 89) | 60.78 ± 9.58 ( 13 ~ 82) | 61.51 ± 11.58 ( 15 ~ 84) | 63.77 ± 9.18 ( 39 ~ 84) | 68.79 ± 9.4 ( 40 ~ 88) |               |              | 63.58 ± 8.73 ( 32 ~ 76) | 68.94 ± 8.63 ( 43 ~ 92 ) |
| Type          | Normal                  | 35 ( 2.80)               | 20 ( 8.13)              |                         | 14 ( 4.56)               |                         |                        |               | 1 ( 5.88)    |                         |                          |
|               | Tumor                   | 1216 ( 97.20)            | 226 ( 91.87)            | 138 ( 100.00)           | 293 ( 95.44)             | 196 ( 100.00)           | 181 ( 100.00)          | 111 ( 100.00) | 16 ( 94.12)  | 55 ( 0.00)              | 482 (100.00)             |
| Gender        | Male                    | 716 ( 63.59)             | 116 ( 47.15)            | 104 ( 75.36)            | 250 ( 85.32)             | 107 ( 54.59)            | 98 ( 54.14)            |               | 3 ( 17.65)   | 38 ( 69.09)             | 313 ( 64.94)             |
|               | Female                  | 410 ( 36.41)             | 130 ( 52.85)            | 34 ( 24.64)             | 43 ( 14.68)              | 89 ( 45.41)             | 83 ( 45.86)            |               | 14 ( 82.35)  | 17 ( 30.91)             | 169 ( 35.06)             |
| Smoking       | No                      | 153 ( 32.08)             | 123 ( 50.00)            |                         |                          |                         | 24 ( 15.00)            |               | 4 ( 25.00)   | 2 ( 3.64)               |                          |
|               | Yes                     | 324 ( 67.92)             | 123 ( 50.00)            |                         |                          |                         | 136 ( 85.00)           |               | 12 ( 75.00)  | 53 ( 96.36)             |                          |
| Stage         | 1                       | 612 ( 63.29)             | 168 ( 74.34)            |                         | 152 ( 51.88)             | 130 ( 66.33)            | 127 ( 70.17)           |               | 11 ( 68.75)  | 24 ( 43.64)             | 186 ( 38.59)             |
|               | 2                       | 209 ( 21.61)             | 58 ( 25.66)             |                         | 43 ( 14.68)              | 35 ( 17.86)             | 54 ( 29.83)            |               | 5 ( 31.25)   | 14 ( 25.45)             | 247 ( 51.24)             |
|               | 3                       | 131 ( 13.55)             |                         |                         | 87 ( 29.69)              | 27 ( 13.78)             |                        |               |              | 17 ( 30.91)             | 49 ( 10.17)              |
|               | 4                       | 15 ( 1.55)               |                         |                         | 11 ( 3.75)               | 4 ( 2.04)               |                        |               |              |                         |                          |
| EGFR mutation | No                      | 107 ( 44.21)             | 99 ( 43.81)             |                         |                          |                         |                        |               | 8 ( 50.00)   |                         |                          |
|               | Yes                     | 135 ( 55.79)             | 127 ( 56.19)            |                         |                          |                         |                        |               | 8 ( 50.00)   |                         |                          |
| Histology     | Adenocarcinoma          | 713 ( 57.97)             | 226 ( 100.00)           | 63 ( 45.65)             | 85 ( 27.69)              | 106 ( 54.08)            | 129 ( 71.27)           | 58 ( 52.25)   | 16 ( 100.00) | 30 ( 54.55)             |                          |
|               | Squamous cell carcinoma | 344 ( 27.97)             |                         | 75 ( 54.35)             | 82 ( 26.71)              | 66 ( 33.67)             | 43 ( 23.76)            | 53 ( 47.75)   |              | 25 ( 45.45)             | 482 (100.00)             |
|               | Large cell carcinoma    | 92 ( 7.48)               |                         |                         | 59 ( 19.22)              | 24 ( 12.24)             | 9 ( 4.97)              |               |              |                         |                          |
|               | Others                  | 81 ( 6.59)               |                         |                         | 81 ( 26.38)              |                         |                        |               |              |                         |                          |
| Relapse       | No                      | 603 ( 61.16)             | 162 ( 71.68)            | 69 ( 50.00)             | 164 ( 58.99)             | 47 ( 48.96)             | 126 ( 71.19)           |               | 8 ( 50.00)   | 27 ( 49.09)             |                          |
|               | Yes                     | 383 ( 38.84)             | 64 ( 28.32)             | 69 ( 50.00)             | 114 ( 41.01)             | 49 ( 51.04)             | 51 ( 28.81)            |               | 8 ( 50.00)   | 28 ( 50.91)             |                          |
| Survival      | Alive                   | 545 ( 50.56)             | 191 ( 84.51)            |                         | 93 ( 31.74)              | 51 ( 26.02)             | 106 ( 58.56)           | 53 ( 47.75)   | 14 ( 87.50)  | 37 ( 62.27)             | 219 ( 45.44)             |
|               | Dead                    | 533 ( 49.44)             | 35 ( 15.49)             |                         | 200 ( 68.26)             | 145 ( 73.98)            | 75 ( 41.44)            | 58 ( 52.25)   | 2 ( 12.50)   | 18 ( 32.73)             | 263 ( 54.56)             |

SD: standard deviation

Supplement Table 2 ROC analysis of gene expression of PD1 and PDL1 for predicting outcome in lung cancer patients

|                                     | Gene expression    |                      |                    |                      |
|-------------------------------------|--------------------|----------------------|--------------------|----------------------|
|                                     | PD1                |                      | PDL1               |                      |
|                                     | AUC (95%CI)        | P-value <sup>a</sup> | AUC (95%CI)        | P-value <sup>a</sup> |
| <b>Non-relapse vs. relapse</b>      |                    |                      |                    |                      |
| Adenocarcinoma stage 1              | 0.55 (0.48 ~ 0.62) | 0.1377               | 0.54 (0.48 ~ 0.61) | 0.2129               |
| Adenocarcinoma stage 2+3+4          | 0.55 (0.46 ~ 0.65) | 0.2565               | 0.51 (0.42 ~ 0.61) | 0.7681               |
| Squamous cell carcinoma stage 1     | 0.60 (0.49 ~ 0.72) | 0.0839               | 0.59 (0.47 ~ 0.72) | 0.1456               |
| Squamous cell carcinoma stage 2+3+4 | 0.57 (0.43 ~ 0.70) | 0.3272               | 0.59 (0.46 ~ 0.73) | 0.1603               |
| <b>Alive vs. death</b>              |                    |                      |                    |                      |
| Adenocarcinoma stage 1              | 0.72 (0.67 ~ 0.78) | <b>&lt;0.0001</b>    | 0.74 (0.69 ~ 0.79) | <b>&lt;0.0001</b>    |
| Adenocarcinoma stage 2+3+4          | 0.77 (0.69 ~ 0.84) | <b>&lt;0.0001</b>    | 0.77 (0.69 ~ 0.84) | <b>&lt;0.0001</b>    |
| Squamous cell carcinoma stage 1     | 0.55 (0.44 ~ 0.67) | 0.3845               | 0.59 (0.48 ~ 0.70) | 0.0964               |
| Squamous cell carcinoma stage 2+3+4 | 0.79 (0.68 ~ 0.89) | <b>&lt;0.0001</b>    | 0.78 (0.67 ~ 0.89) | <b>&lt;0.0001</b>    |

ROC: receiver operating characteristic, AUC: areas under the ROC curves, CI: confidence interval

<sup>a</sup>: P value for Mann-Whitney U test

**Bold face**: statistical significant (P value<0.05)

Supplement Table 3 PD1 and PDL1 gene Affymetrix probes gene expression at different study

|                 | PD1             |                      |                                |                      |                                  |                      |                      |                      |
|-----------------|-----------------|----------------------|--------------------------------|----------------------|----------------------------------|----------------------|----------------------|----------------------|
|                 | Raw data        |                      | Quantile normalization by mean |                      | Quantile normalization by Median |                      | Bayes' normalization |                      |
|                 | Mean ± SD       | P-Value <sup>a</sup> | Mean ± SD                      | P-Value <sup>a</sup> | Mean ± SD                        | P-Value <sup>a</sup> | Mean ± SD            | P-Value <sup>a</sup> |
|                 |                 | <0.0001              |                                | <0.0001              |                                  | <0.0001              |                      | <b>0.9377</b>        |
| <b>GSE50081</b> | 5.37 ± 0.35     |                      | 66.18 ± 20.51                  |                      | 6.03 ± 0.27                      |                      | 5.32 ± 0.64          |                      |
| <b>GSE30219</b> | 5.69 ± 0.23     |                      | 64.51 ± 10.6                   |                      | 6.02 ± 0.15                      |                      | 5.32 ± 0.63          |                      |
| <b>GSE31210</b> | 34.76 ± 20.69   |                      | 15.21 ± 7.89                   |                      | 4.17 ± 0.64                      |                      | 5.32 ± 0.66          |                      |
| <b>GSE8894</b>  | 2.33 ± 0.16     |                      | 7.51 ± 7.05                    |                      | 3.49 ± 0.48                      |                      | 5.32 ± 0.58          |                      |
| <b>GSE37745</b> | 6.80 ± 0.24     |                      | 79.01 ± 14.72                  |                      | 6.22 ± 0.19                      |                      | 5.32 ± 0.62          |                      |
| <b>GSE3141</b>  | 102.39 ± 91.41  |                      | 18.46 ± 15.31                  |                      | 4.27 ± 0.83                      |                      | 5.31 ± 0.66          |                      |
| <b>GSE31908</b> | 6.25 ± 0.20     |                      | 47.32 ± 8.2                    |                      | 5.72 ± 0.19                      |                      | 5.32 ± 0.58          |                      |
| <b>GSE29013</b> | 5.34 ± 1.08     |                      | 45.85 ± 54.47                  |                      | 5.11 ± 1.10                      |                      | 5.32 ± 0.65          |                      |
|                 |                 |                      |                                |                      |                                  |                      |                      |                      |
|                 | PDL1            |                      |                                |                      |                                  |                      |                      |                      |
|                 | Raw data        |                      | Quantile normalization by mean |                      | Quantile normalization by Median |                      | Bayes' normalization |                      |
|                 | Mean ± SD       | P-Value <sup>a</sup> | Mean ± SD                      | P-Value <sup>a</sup> | Mean ± SD                        | P-Value <sup>a</sup> | Mean ± SD            | P-Value <sup>a</sup> |
|                 |                 | <0.0001              |                                | <0.0001              |                                  | <b>0.1297</b>        |                      | <b>0.3560</b>        |
| <b>GSE50081</b> | 5.35 ± 0.78     |                      | 92.28 ± 111.50                 |                      | 6.06 ± 0.70                      |                      | 6.67 ± 0.93          |                      |
| <b>GSE30219</b> | 5.92 ± 1.02     |                      | 120.52 ± 155.33                |                      | 6.26 ± 0.95                      |                      | 6.67 ± 0.97          |                      |
| <b>GSE31210</b> | 628.08 ± 429.63 |                      | 180.15 ± 112.16                |                      | 6.82 ± 0.56                      |                      | 6.67 ± 0.89          |                      |
| <b>GSE8894</b>  | 4.26 ± 1.45     |                      | 150.85 ± 207.27                |                      | 6.10 ± 1.21                      |                      | 6.67 ± 0.95          |                      |
| <b>GSE37745</b> | 7.22 ± 0.97     |                      | 175.99 ± 193.27                |                      | 6.73 ± 0.96                      |                      | 6.67 ± 0.96          |                      |
| <b>GSE3141</b>  | 689.58 ± 508.63 |                      | 193.57 ± 174.07                |                      | 6.92 ± 0.89                      |                      | 6.67 ± 0.84          |                      |
| <b>GSE31908</b> | 6.47 ± 0.28     |                      | 75.46 ± 24.18                  |                      | 5.90 ± 0.33                      |                      | 6.66 ± 0.76          |                      |
| <b>GSE29013</b> | 6.97 ± 0.75     |                      | 222.37 ± 182.97                |                      | 7.17 ± 1.10                      |                      | 6.67 ± 0.70          |                      |

SD: standard deviation

<sup>a</sup>: P-value for homogeneity Levene's Test

**Bold face**: statistical significant (P value > 0.05)

Supplement Figure 1 PD1 and PDL1 gene expression forest plot

**A**

| Study        | Hazard ratio (95% CI)     |
|--------------|---------------------------|
| GSE50081     | 1.14 (0.75 ~ 1.72)        |
| GSE30219     | 0.80 (0.59 ~ 1.08)        |
| GSE31210     | 1.33 (0.90 ~ 1.98)        |
| GSE8894      | 0.74 (0.44 ~ 1.26)        |
| GSE37745     | 1.00 (0.64 ~ 1.55)        |
| GSE31908     | 1.80 (0.30 ~ 11.00)       |
| GSE29013     | 1.12 (0.62 ~ 2.03)        |
| <b>Total</b> | <b>0.99 (0.84 ~ 1.15)</b> |

|                       |
|-----------------------|
| GSE50081 (N=181)      |
| GSE30219 (N=307)      |
| GSE31210 (N=246)      |
| GSE8894 (N=138)       |
| GSE37745 (N=196)      |
| GSE31908 (N=17)       |
| GSE29013 (N=55)       |
| <b>Total (N=1140)</b> |

**PD1 Forest plot**

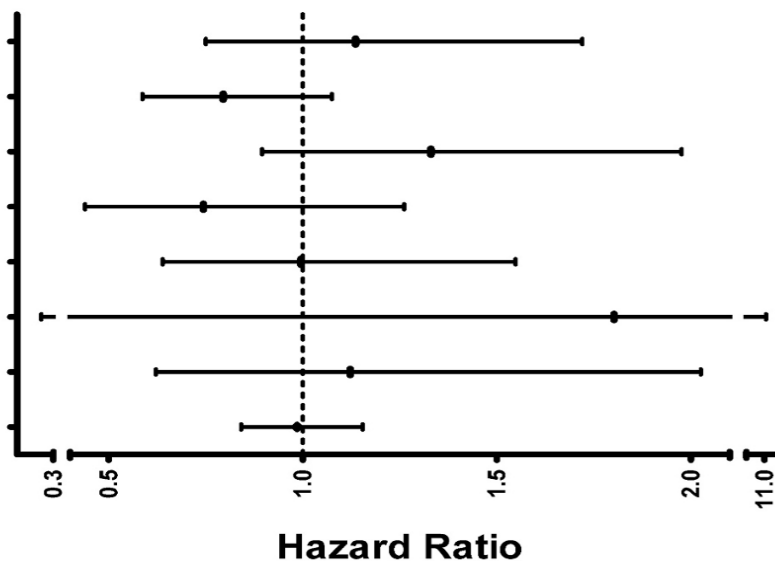

| Weight (random) |
|-----------------|
| 16.75%          |
| 30.01%          |
| 18.31%          |
| 10.60%          |
| 14.88%          |
| 0.93%           |
| 8.51%           |
| <b>100.00%</b>  |

**B**

| Study        | Hazard ratio (95% CI)     |
|--------------|---------------------------|
| GSE50081     | 1.14 (0.88 ~ 1.49)        |
| GSE30219     | 1.03 (0.85 ~ 1.24)        |
| GSE31210     | 1.28 (0.99 ~ 1.67)        |
| GSE8894      | 1.04 (0.81 ~ 1.34)        |
| GSE37745     | 0.97 (0.73 ~ 1.29)        |
| GSE31908     | 1.06 (0.40 ~ 2.83)        |
| GSE29013     | 1.60 (0.91 ~ 2.81)        |
| <b>Total</b> | <b>1.10 (0.99 ~ 1.23)</b> |

|                       |
|-----------------------|
| GSE50081 (N=181)      |
| GSE30219 (N=307)      |
| GSE31210 (N=246)      |
| GSE8894 (N=138)       |
| GSE37745 (N=196)      |
| GSE31908 (N=17)       |
| GSE29013 (N=55)       |
| <b>Total (N=1140)</b> |

**PDL1 Forest Plot**

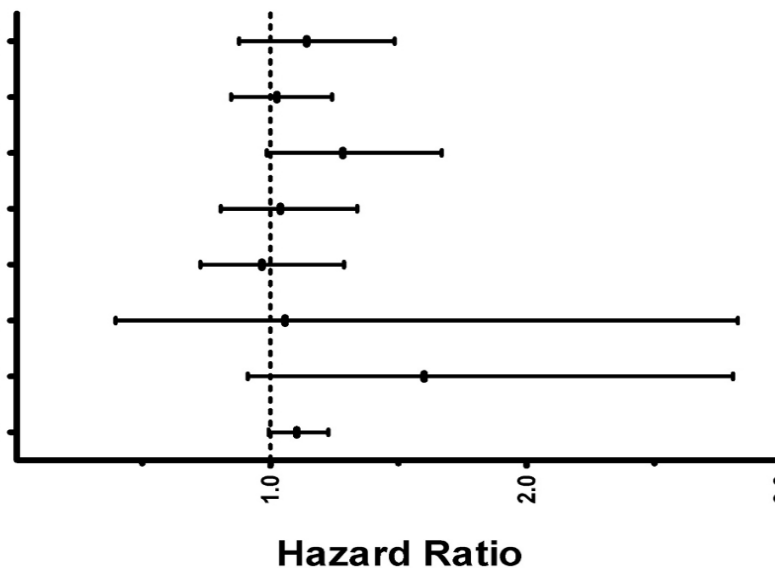

| Weight (random) |
|-----------------|
| 16.37%          |
| 31.03%          |
| 16.34%          |
| 17.62%          |
| 13.88%          |
| 1.17%           |
| 3.59%           |
| <b>100.00%</b>  |

Meta-analyses random effects model forest plot in PD1 (A), PDL1 (B).

Supplement Figure 2 PD1 and PDL1 gene expression in different normalized methods

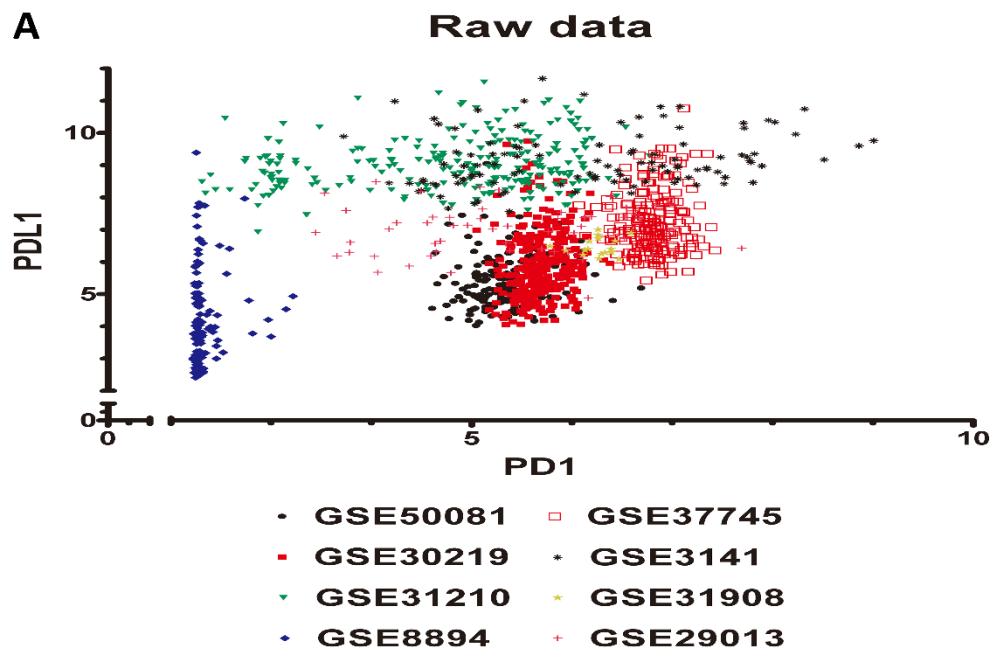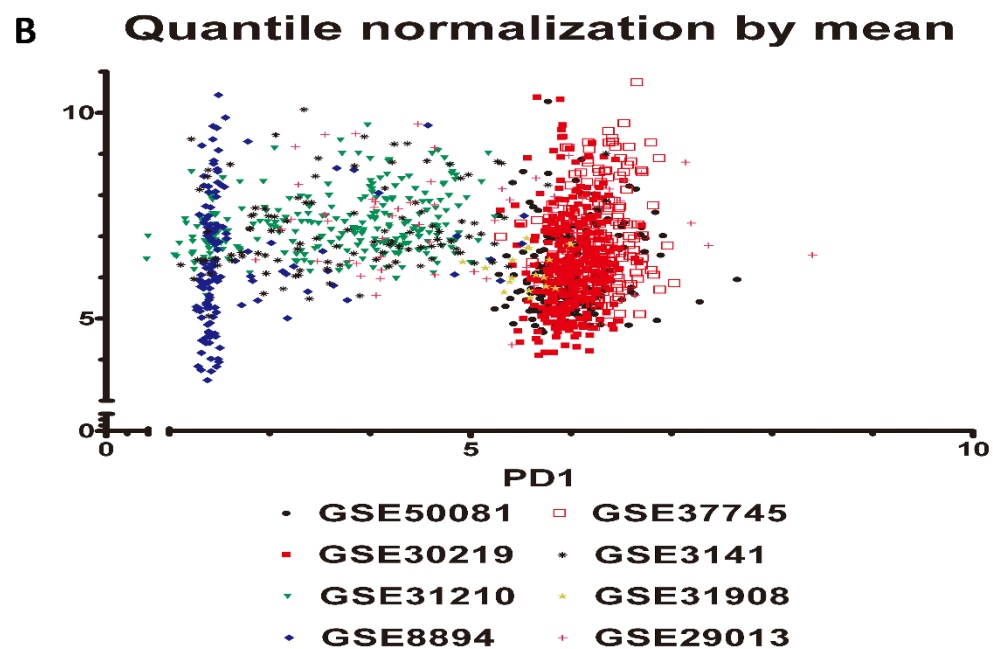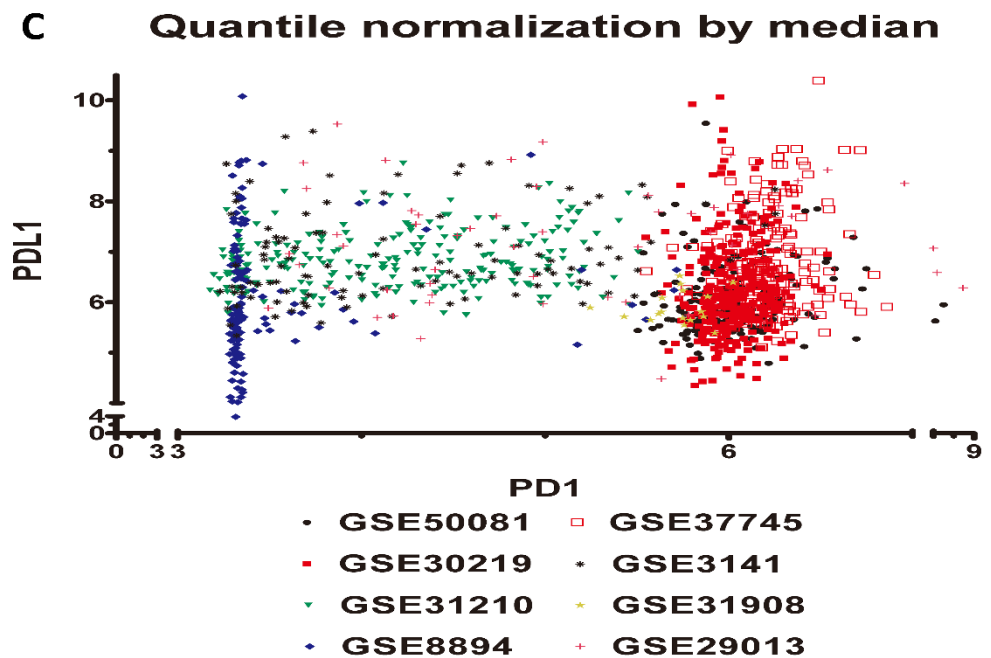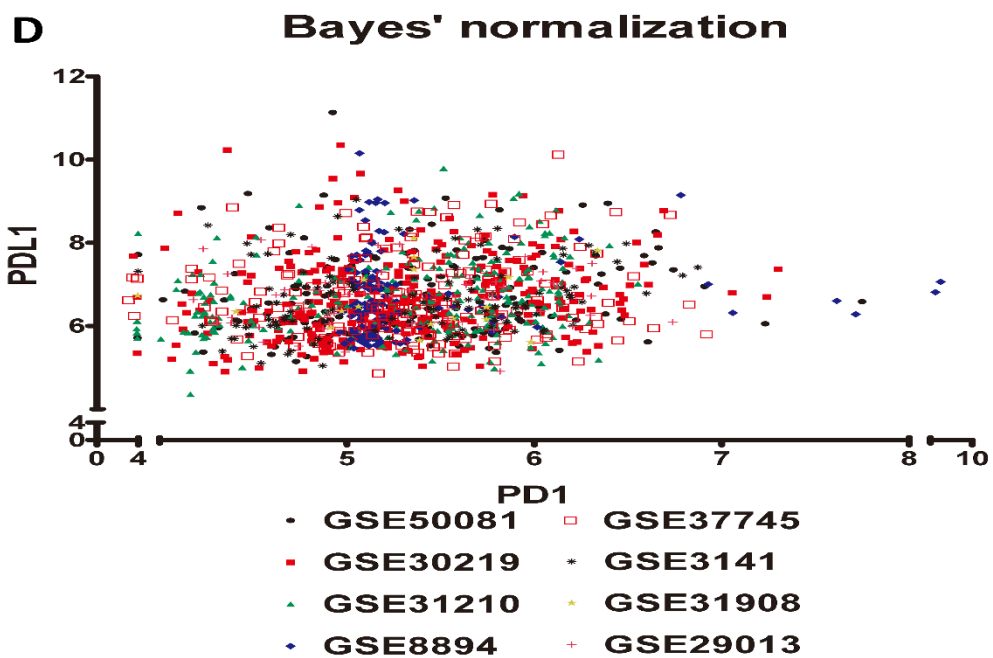

Scatter plot of PD1 and PDL1 gene expression in raw data(A), quantile normalization by mean (B), quantile normalization by median (C), and Bayes' normalization (D).
